# Supplementary material
Source: bioRxiv or medRxiv preprint supplement (https://medrxiv.org/highwire/filestream/84787/field_highwire_adjunct_files/0/2020.06.05.20123323-1.pdf)
Supplement: Supplementary file [file 2020.06.05.20123323-1.pdf]

## Appendix D. Supplemental Tables and Figures

**Table D.1: Predictor list and information from training dataset when patients were most acutely ill.**

| Feature                        | Type      | Mean   | Std. Dev. | Missing (%) | Missing (%) No Event* | Missing (%) With Event* |
|--------------------------------|-----------|--------|-----------|-------------|-----------------------|-------------------------|
| Age                            | Numeric   | 57.36  | 17.95     | 0.00        | 0.00                  | 0.00                    |
| Albumin                        | Numeric   | 3.68   | 0.65      | 40.04       | 41.38                 | 11.66                   |
| Anion Gap                      | Numeric   | 12.08  | 3.09      | 12.92       | 13.39                 | 3.01                    |
| Blood Urea Nitrogen (BUN)      | Numeric   | 20.44  | 15.85     | 13.06       | 13.57                 | 2.27                    |
| Bilirubin                      | Numeric   | 1.09   | 2.58      | 41.20       | 42.54                 | 12.64                   |
| CO2                            | Numeric   | 26.06  | 3.81      | 12.92       | 13.39                 | 3.01                    |
| Calcium                        | Numeric   | 8.94   | 0.70      | 12.71       | 13.21                 | 2.18                    |
| Chloride                       | Numeric   | 104.50 | 4.80      | 12.59       | 13.08                 | 2.09                    |
| Creatinine                     | Numeric   | 1.13   | 1.19      | 12.50       | 12.99                 | 2.12                    |
| Diastolic Blood Pressure       | Numeric   | 66.75  | 13.96     | 0.03        | 0.03                  | 0.06                    |
| Female                         | Indicator | 0.49   | 0.50      | 0.00        | 0.00                  | 0.00                    |
| Fluid Bolus Ordered            | Indicator | 0.10   | 0.30      | 0.00        | 0.00                  | 0.00                    |
| Glasgow Coma Scale             | Numeric   | 14.57  | 1.35      | 22.21       | 22.40                 | 18.10                   |
| Glucose                        | Numeric   | 127.51 | 55.39     | 9.11        | 9.48                  | 1.35                    |
| Heart Rate                     | Numeric   | 84.54  | 20.47     | 0.02        | 0.02                  | 0.06                    |
| Height                         | Numeric   | 1.70   | 0.11      | 34.85       | 35.07                 | 30.34                   |
| Hematocrit                     | Numeric   | 35.17  | 6.56      | 11.45       | 11.87                 | 2.45                    |
| Hemoglobin                     | Numeric   | 11.70  | 2.37      | 12.20       | 12.63                 | 2.91                    |
| International Normalized Ratio | Numeric   | 1.25   | 2.18      | 49.71       | 51.36                 | 14.66                   |
| Lactate                        | Numeric   | 1.64   | 1.29      | 65.49       | 67.38                 | 25.37                   |
| Magnesium                      | Numeric   | 1.93   | 0.34      | 50.82       | 52.51                 | 15.09                   |
| Max O2 24hrs                   | Numeric   | 2.21   | 3.66      | 0.09        | 0.08                  | 0.34                    |

|                                  |           |        |        |       |       |       |
|----------------------------------|-----------|--------|--------|-------|-------|-------|
| Mean Arterial Pressure           | Numeric   | 85.33  | 16.81  | 0.03  | 0.03  | 0.06  |
| Mean Corps. HGB                  | Numeric   | 29.60  | 2.68   | 12.21 | 12.65 | 2.91  |
| Mean Corps. HGB Conc.            | Numeric   | 33.19  | 1.52   | 12.21 | 12.65 | 2.91  |
| Mean Corps. HGB Vol.             | Numeric   | 89.13  | 6.63   | 12.20 | 12.64 | 2.85  |
| Mean Platelet Vol.               | Numeric   | 10.22  | 0.99   | 13.60 | 13.93 | 6.63  |
| Min SPO2 24hrs                   | Numeric   | 92.80  | 5.85   | 0.09  | 0.09  | 0.09  |
| Partial Thromboplastin           | Numeric   | 28.53  | 8.34   | 58.78 | 60.24 | 27.67 |
| Partial Thromboplastin Time      | Numeric   | 12.84  | 6.32   | 50.47 | 52.12 | 15.34 |
| Phosphorus                       | Numeric   | 3.61   | 1.07   | 58.50 | 60.17 | 23.22 |
| Platelets                        | Numeric   | 227.23 | 105.65 | 12.31 | 12.76 | 2.91  |
| Potassium                        | Numeric   | 4.21   | 0.55   | 11.55 | 12.02 | 1.63  |
| Protein Level                    | Numeric   | 6.44   | 0.96   | 41.12 | 42.46 | 12.61 |
| Pulse Pressure                   | Numeric   | 0.45   | 0.08   | 0.05  | 0.04  | 0.12  |
| Race - Asian                     | Indicator | 0.02   | 0.14   | 0.00  | 0.00  | 0.00  |
| Race - Black or African American | Indicator | 0.11   | 0.31   | 0.00  | 0.00  | 0.00  |
| Race - Other                     | Indicator | 0.04   | 0.20   | 0.00  | 0.00  | 0.00  |
| Race - White or Caucasian        | Indicator | 0.83   | 0.38   | 0.00  | 0.00  | 0.00  |
| Red Blood Cell Count             | Numeric   | 3.97   | 0.79   | 12.20 | 12.64 | 2.85  |
| Red Blood Cell Dist. Width       | Numeric   | 14.74  | 2.44   | 12.25 | 12.68 | 3.01  |
| Respiratory Device Used          | Indicator | 0.50   | 0.50   | 0.00  | 0.00  | 0.00  |
| Respiratory Rate                 | Numeric   | 18.20  | 5.10   | 0.09  | 0.09  | 0.03  |
| Shock Index                      | Numeric   | 0.71   | 0.50   | 0.08  | 0.08  | 0.15  |

|                         |         |        |        |       |       |       |
|-------------------------|---------|--------|--------|-------|-------|-------|
| Shock Index x Age       | Numeric | 40.18  | 33.14  | 0.08  | 0.08  | 0.15  |
| Sodium                  | Numeric | 138.43 | 3.78   | 11.56 | 12.03 | 1.63  |
| Systolic Blood Pressure | Numeric | 122.49 | 26.08  | 0.03  | 0.03  | 0.06  |
| Temperature             | Numeric | 36.72  | 1.55   | 2.72  | 2.67  | 3.71  |
| Time                    | Numeric | 5.04   | 10.24  | 0.00  | 0.00  | 0.00  |
| Urine 24hrs             | Numeric | 302.24 | 269.17 | 25.84 | 26.15 | 19.33 |
| Weight                  | Numeric | 84.25  | 24.90  | 15.08 | 15.49 | 6.29  |
| White Blood Cell Count  | Numeric | 9.72   | 10.80  | 12.19 | 12.63 | 2.91  |

\* We selected a single window per encounter. For patients with events, we took the window where the event occurred. For encounters without an event, we selected the windows with the highest NEWS score. Thus, for non-event encounters, the data used represents the time the patient was the most ill as determined by NEWS. Pulse-pressure was normalized by the systolic blood pressure.

**Figure D.1: Dataset partitioning for training, tuning and testing our PICTURE model.**

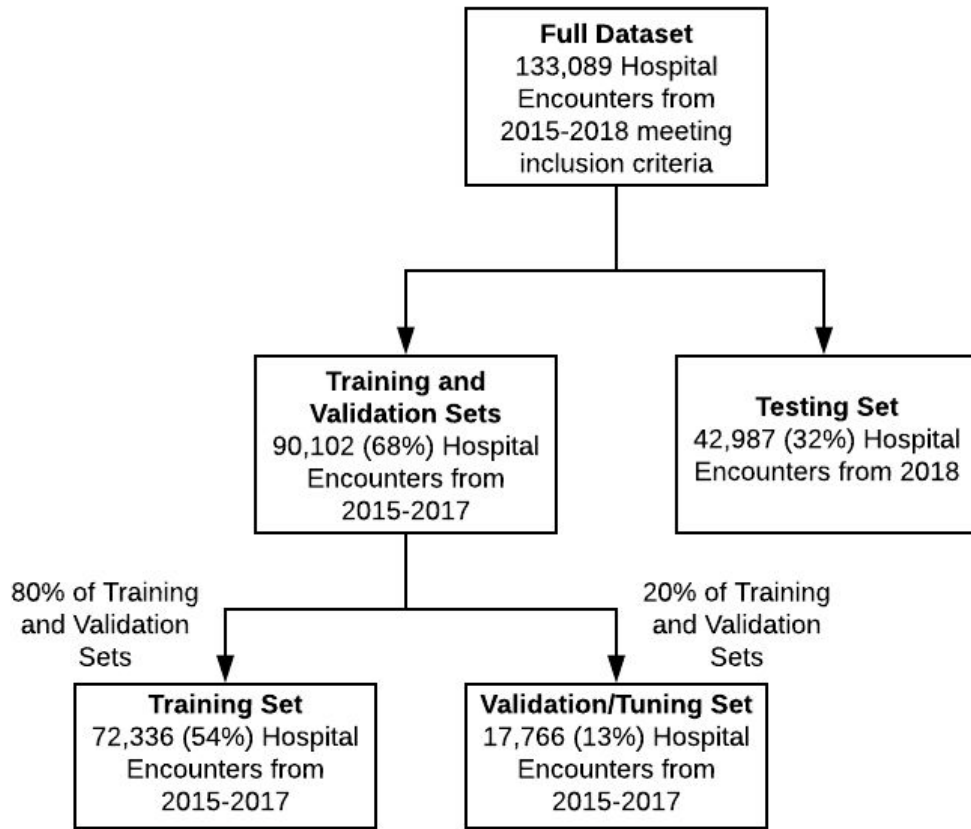

**Figure D.2: Different granularity levels for making predictions.** A prediction can be made at every unique observation for a hospital encounter. This is the lowest level of granularity. An entire hospital encounter can be summarized into a single score by taking the maximum score 24 hours before some adverse event or discharge. For training, we partitioned a hospital encounter into discrete 8-hour non-overlapping blocks. The most recent data up to 1 hour (for missing features) into the window was used to represent the current data for a window. This windowing step normalizes the number of training observations across patients so that two patients in the hospital for the same amount of time will have the same number of training examples.

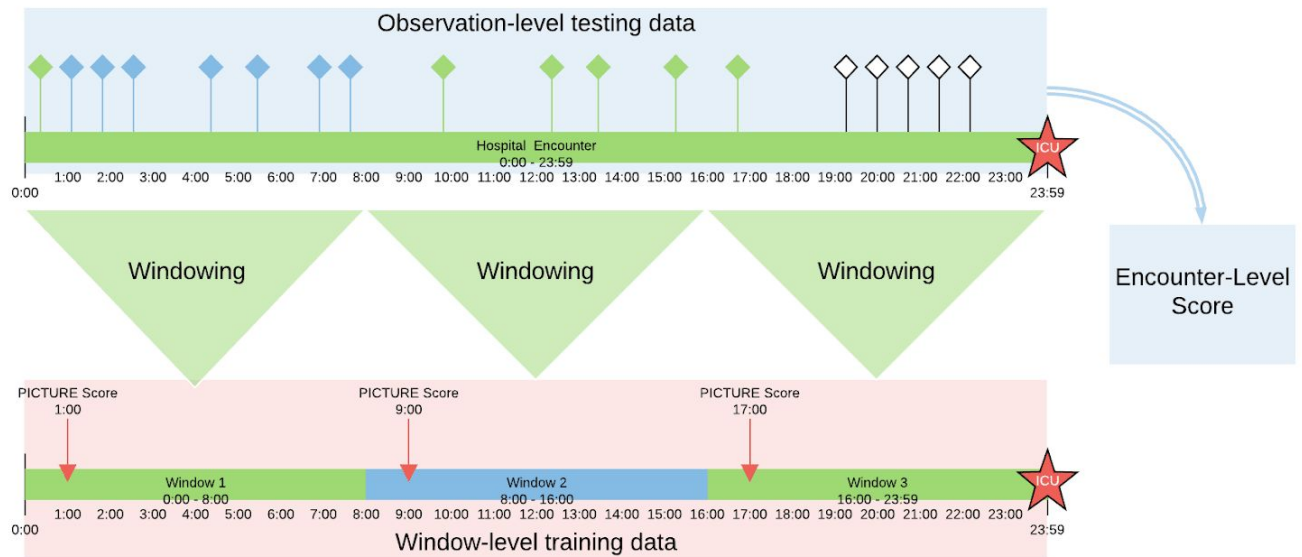

**Figure D.3: Simulation results when training on data with half the missing rate of University of Michigan.** We compared the test performance of XGBoost, a Random forest classifier, logistic regression, and logistic regression with missing value indicators as features across different test setting missingness patterns when training on half the missing data. The same imputation method that was used in training was also used during testing. In Scenario 2, the training data and the test dataset followed the same missingness pattern: the half the missing rates of those in **Table D.1**. In Scenario 1, there was twice as much missing data in the testing dataset as in the training dataset. In Scenario 3, the missingness pattern in the testing dataset was fixed across classes, and it was different in the training dataset. In Scenario 4, the testing dataset was fully observed. These different missing patterns could represent different hospitals or data collection changes. Each panel represents a different classification model and each color within a panel represents a different imputation method. The learning of the missingness pattern is clearly illustrated in the XGBoost classification model with the “Extreme Value” imputation method, where the AUPR was 0.62 in Scenario 2 and 0.2 in Scenario 3. The Random Forest classifiers AUPR dropped from 0.45 in Scenario 2 to 0.25 in Scenario 3. Note that these are the same simulated test patients with a different missingness pattern. Bayesian imputation strategies eliminated the learning of the missingness pattern. Since the tree models learned the missingness pattern, the classification performance increased when the missing rate doubled from Scenario 2 to Scenario 1.

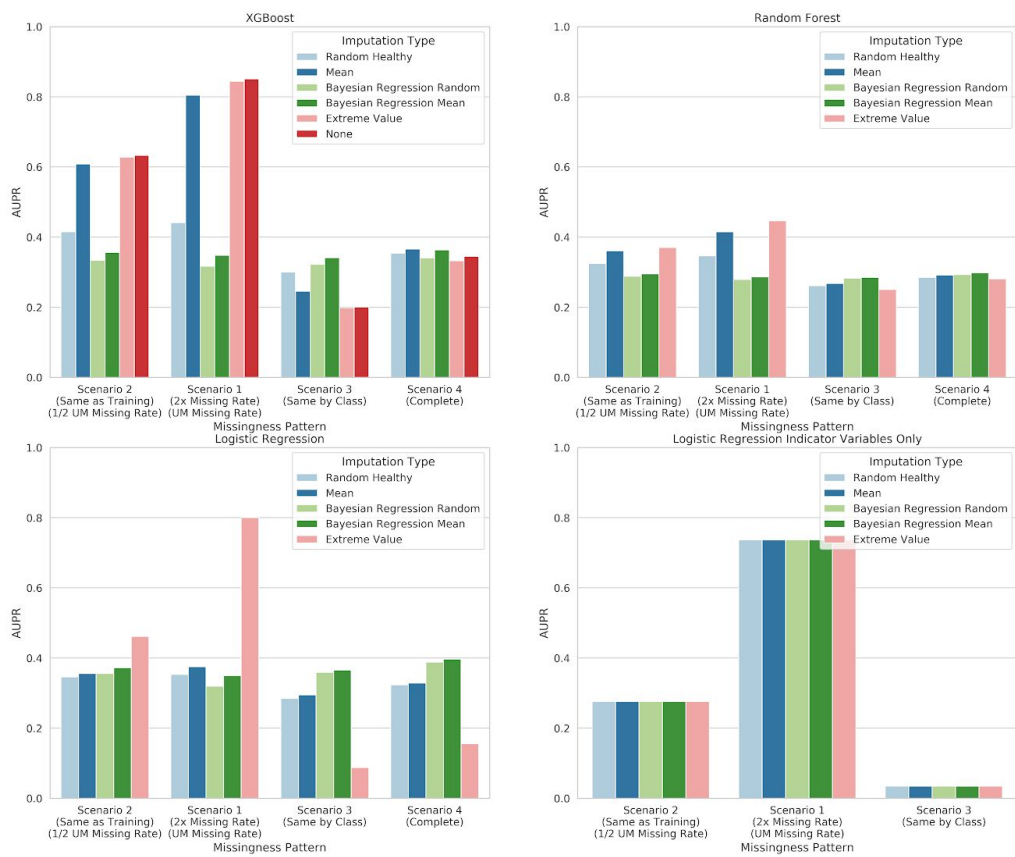

**Figure D.4: Simulation results when training on data with four times lower missing rate than University of Michigan.** We compared the test performance of XGBoost, a Random forest classifier, logistic regression, and logistic regression with missing value indicators as features across different test setting missingness patterns when training on four times less missing data. The same imputation method that was used in training was also used during testing. In Scenario 5, the training data and the test dataset followed the same missingness pattern: the four times lower missing rates of those in **Table D.1**. In Scenario 1, there was twice as much missing data in the testing dataset as in the training dataset. In Scenario 3, the missingness pattern in the testing dataset was fixed across classes, and it was different in the training dataset. In Scenario 4, the testing dataset was fully observed. These different missing patterns could represent different hospitals or data collection changes. Each panel represents a different classification model and each color within a panel represents a different imputation method. The learning of the missingness pattern is now less pronounced in the XGBoost classification model with the “Extreme Value” imputation method, where the AUPR was 0.5 in Scenario 2 and 0.23 in Scenario 3. The Random Forest classifiers AUPR dropped from 0.31 in Scenario 2 to 0.26 in Scenario 3. Therefore, in this training testing situation, the Random Forest classifier did not learn the missingness pattern as much as XGBoost. Since XGBoost still learned the missingness pattern (when not using an appropriate imputation method), its performance dropped when the missing rate increased.

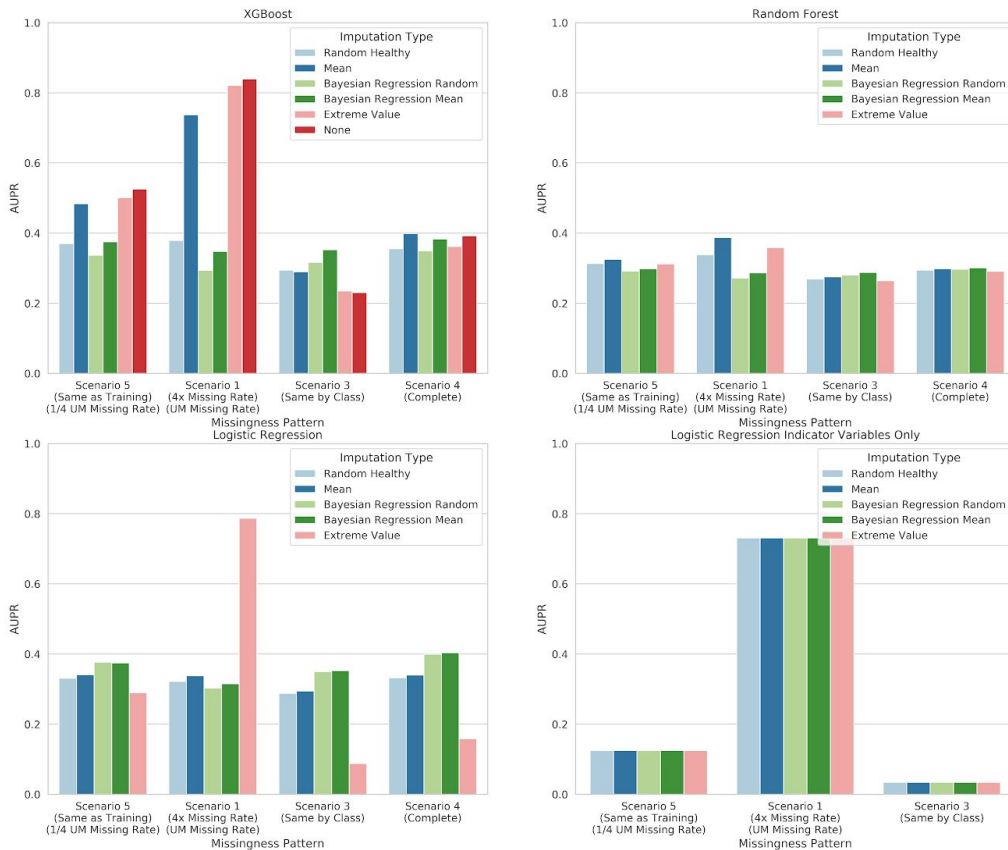

**Figure D.5: Receiver Operating Characteristic curve for PICTURE, logistic regression, NEWS and SOFA at the observation-level.**

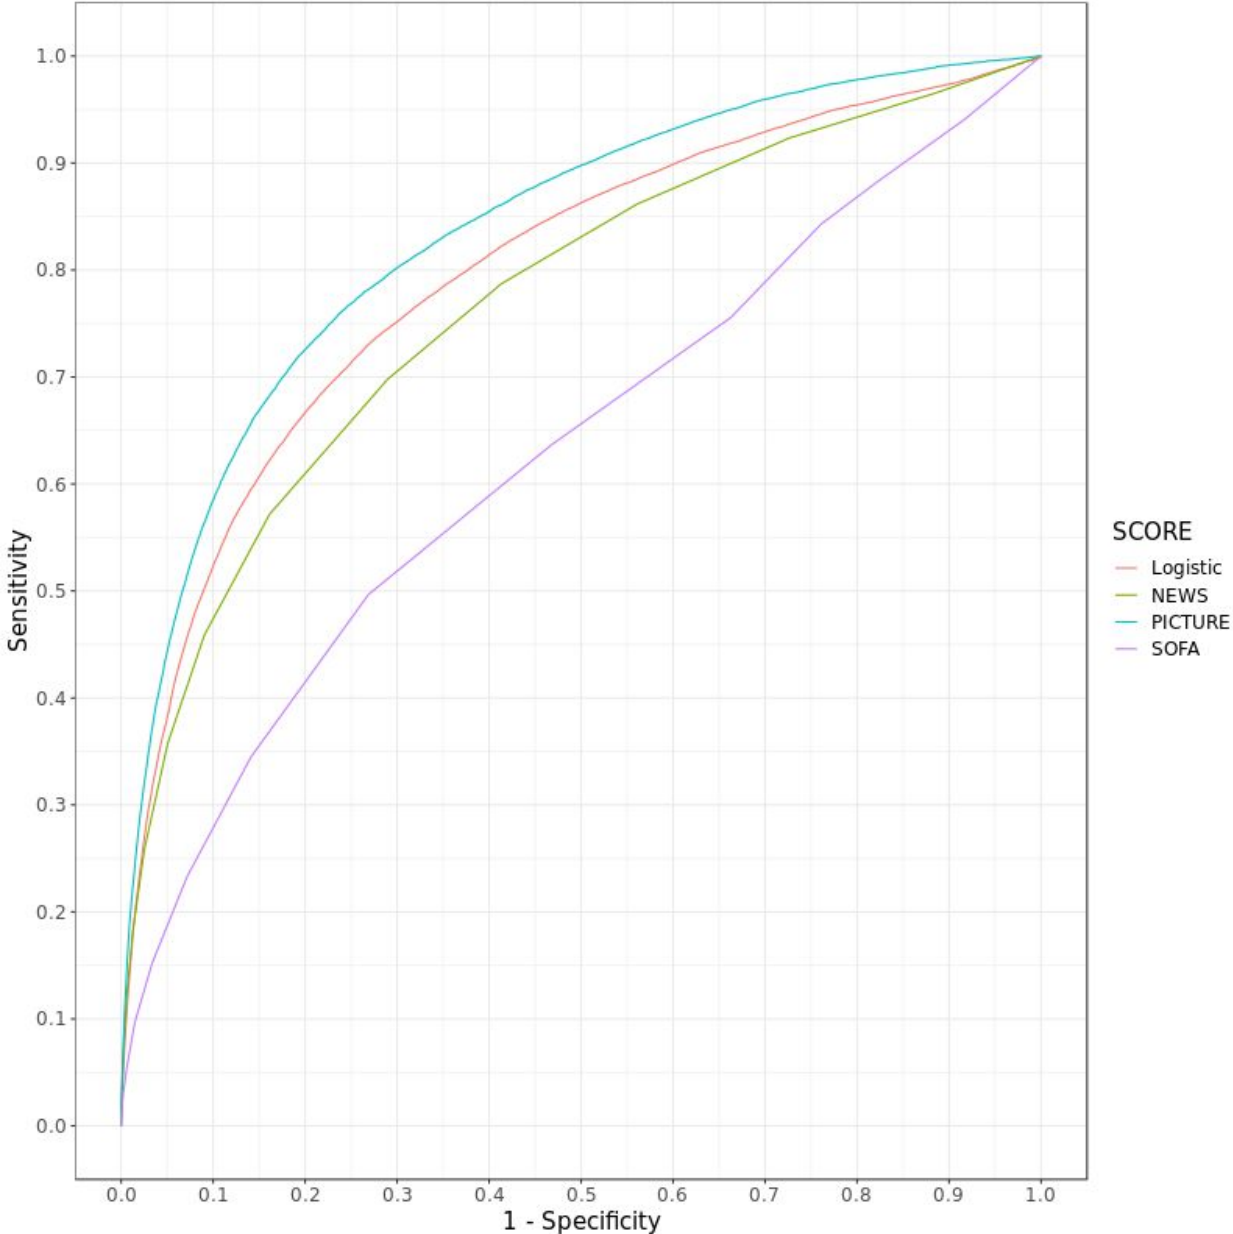



**Figure D.6: Precision-Recall Curve for PICTURE, logistic regression, NEWS, and SOFA at the observation-level. The event rate is 1.0%.**

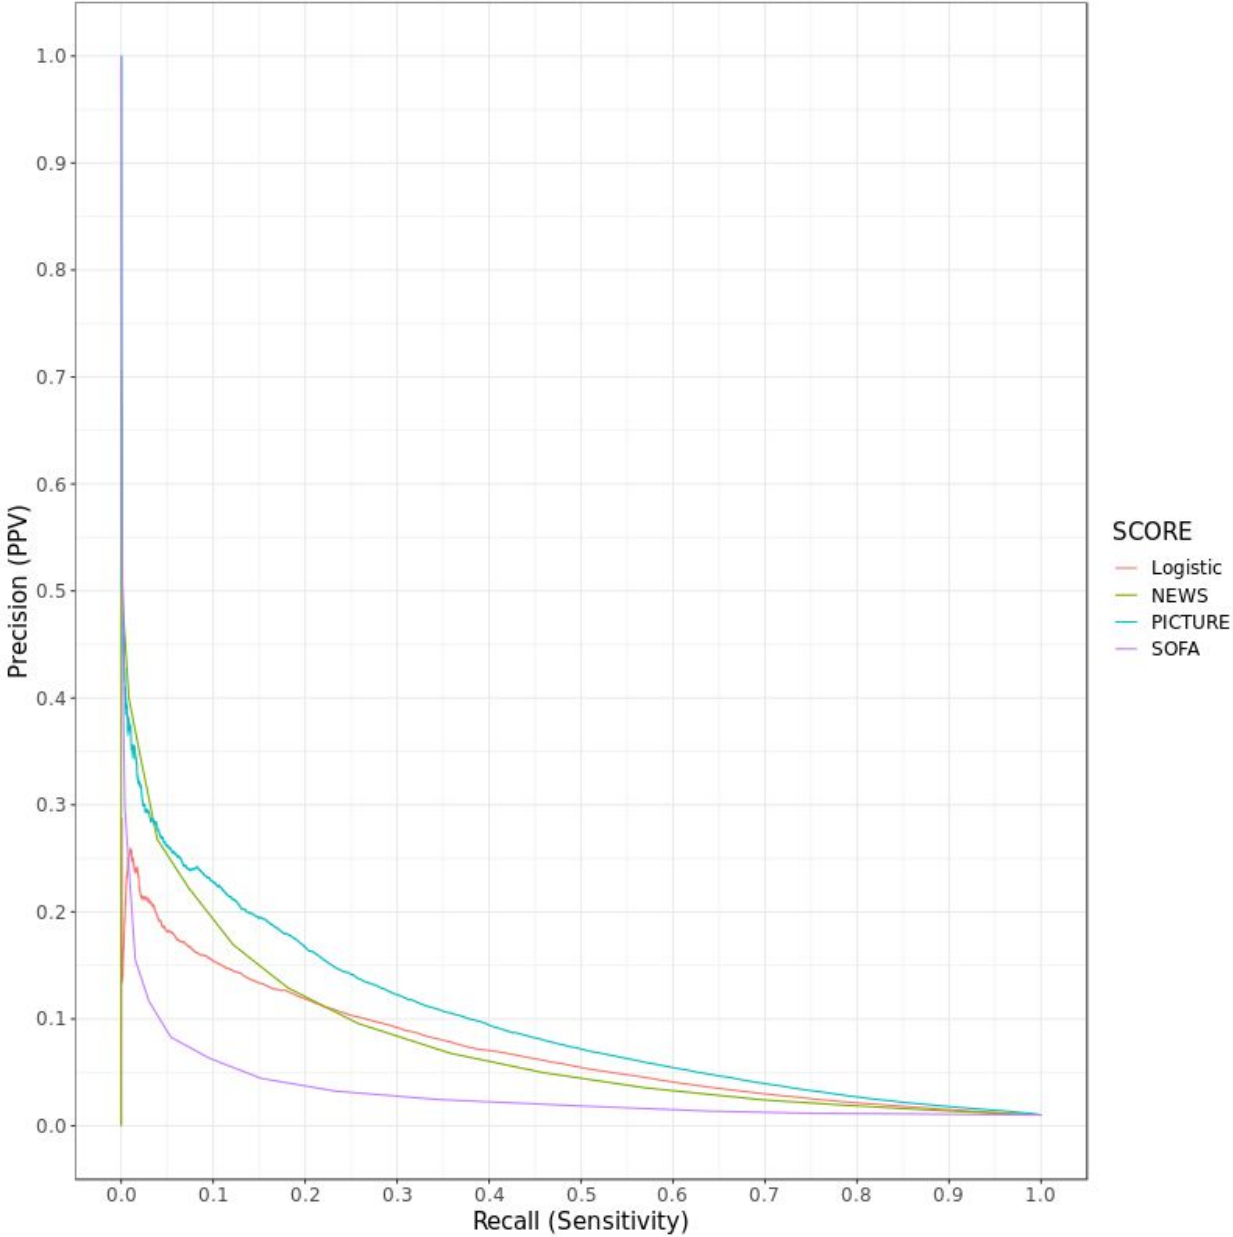

**Figure D.7: The adjusted Precision-Recall Curve for PICTURE, logistic regression, NEWS, and SOFA at the observation-level. The event rate is 4%.**

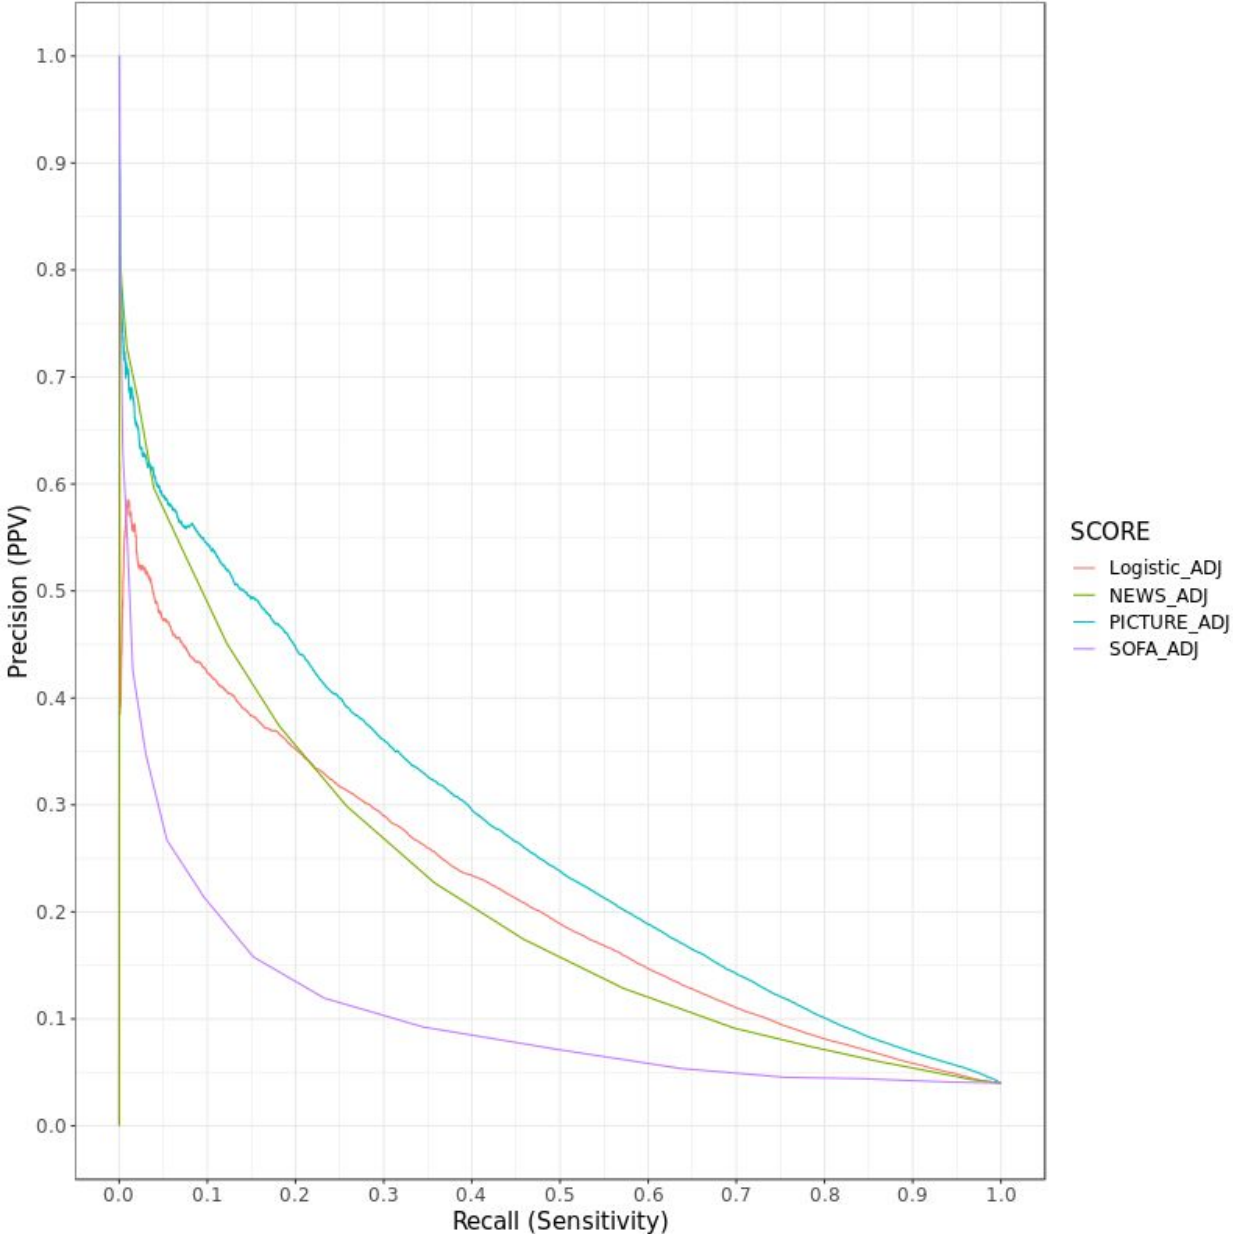

**Table D.2: Example Individual prediction explanations for a patient who had an adverse event.** We present clinicians with a ranked list of the features with the highest attribution and their corresponding observed values when the patient’s risk score passes the alarm threshold.

| Feature            | Feature Attribution | Observed Feature Value |
|--------------------|---------------------|------------------------|
| Glasgow Coma Scale | 1.95                | 3.0                    |
| Respiratory Rate   | 1.76                | 33.0                   |
| Lactate            | 1.25                | 4.1                    |
| Shock Index        | 0.9                 | 1.24                   |
| Hematocrit         | 0.86                | 18.3                   |

**Figure D.8: The top 20 features as determined by the mean absolute Shapley value computed across all encounters using the maximum PICTURE score within an encounter.**

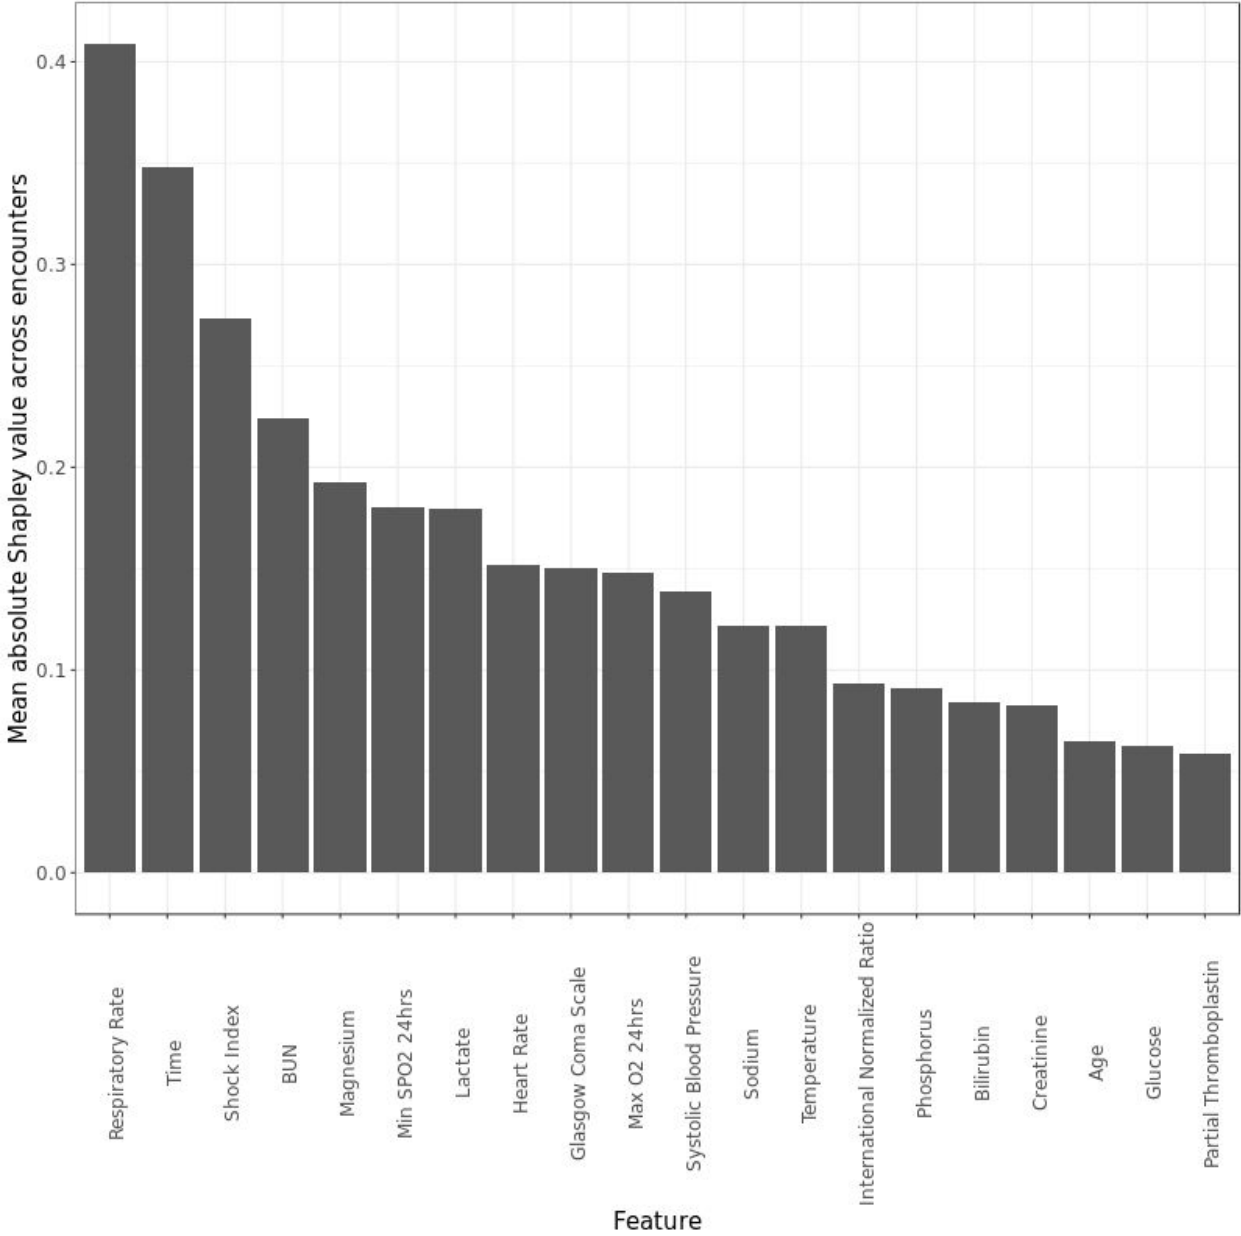

**Table D.3: Simulation performance of imputation methods on testing data.** In this analysis, we set the difference in missing rates between classes (i.e., those with vs. without adverse events) to be 0.8. Extreme Value Imputation and Healthy Mean Imputation experience a significant drop in accuracy and PPV when the missingness pattern changes from the same as training to completely observed data. The Random Healthy Imputation method did not learn the missingness pattern and did not show a performance drop.

| Model                     | Same Missingness Pattern Accuracy | Complete Data Accuracy | Accuracy Drop | Same Missingness Pattern PPV | Complete Data PPV | PPV Drop    |
|---------------------------|-----------------------------------|------------------------|---------------|------------------------------|-------------------|-------------|
| Fully Observed            | 0.77                              | 0.77                   | <b>0</b>      | 0.69                         | 0.69              | <b>0</b>    |
| Healthy Mean Imputation   | 0.90                              | 0.59                   | <b>0.31</b>   | 0.83                         | 0.37              | <b>0.47</b> |
| Extreme Value Imputation  | 0.90                              | 0.74                   | <b>0.15</b>   | 0.75                         | 0.25              | <b>0.50</b> |
| Random Healthy Imputation | 0.77                              | 0.78                   | <b>0</b>      | 0.64                         | 0.65              | <b>0.01</b> |

**Figure D.9: The accuracy difference due to the missingness pattern change increases as the missing rate difference increases between classes (i.e., those with adverse events vs. those without adverse events).** The y-axis shows the decrease in accuracy on the test dataset when using fully observed data instead of data with the same missingness pattern as the training dataset. The x-axis shows the missing rate difference between classes. The larger the missing rate difference between classes, the larger the performance drop for extreme value imputation and healthy mean imputation.

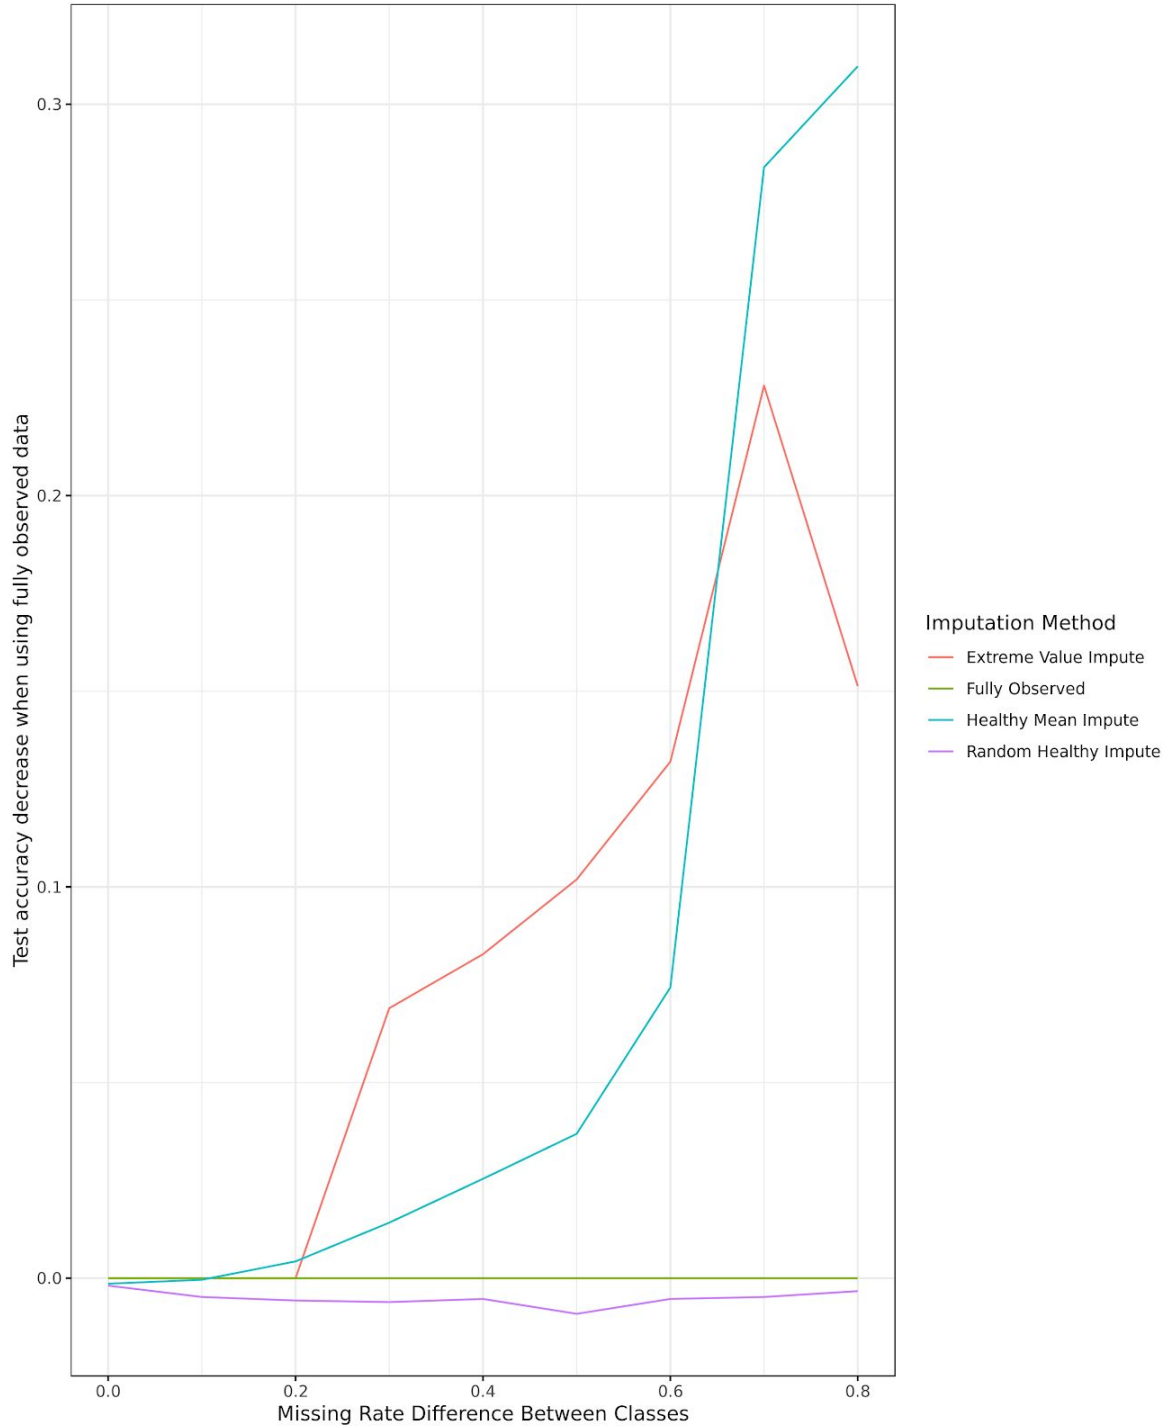

**Figure D.10: The PPV difference due to the missingness pattern change increases as the missing rate difference increases between classes (i.e., those with adverse events vs. those without adverse events).** The y-axis shows the decrease in PPV on the test dataset when using fully observed data instead of data with the same missingness pattern as the training dataset. The x-axis shows the missing rate difference between classes. The larger the missing rate difference between classes, the larger the performance drop for extreme value imputation and healthy mean imputation.

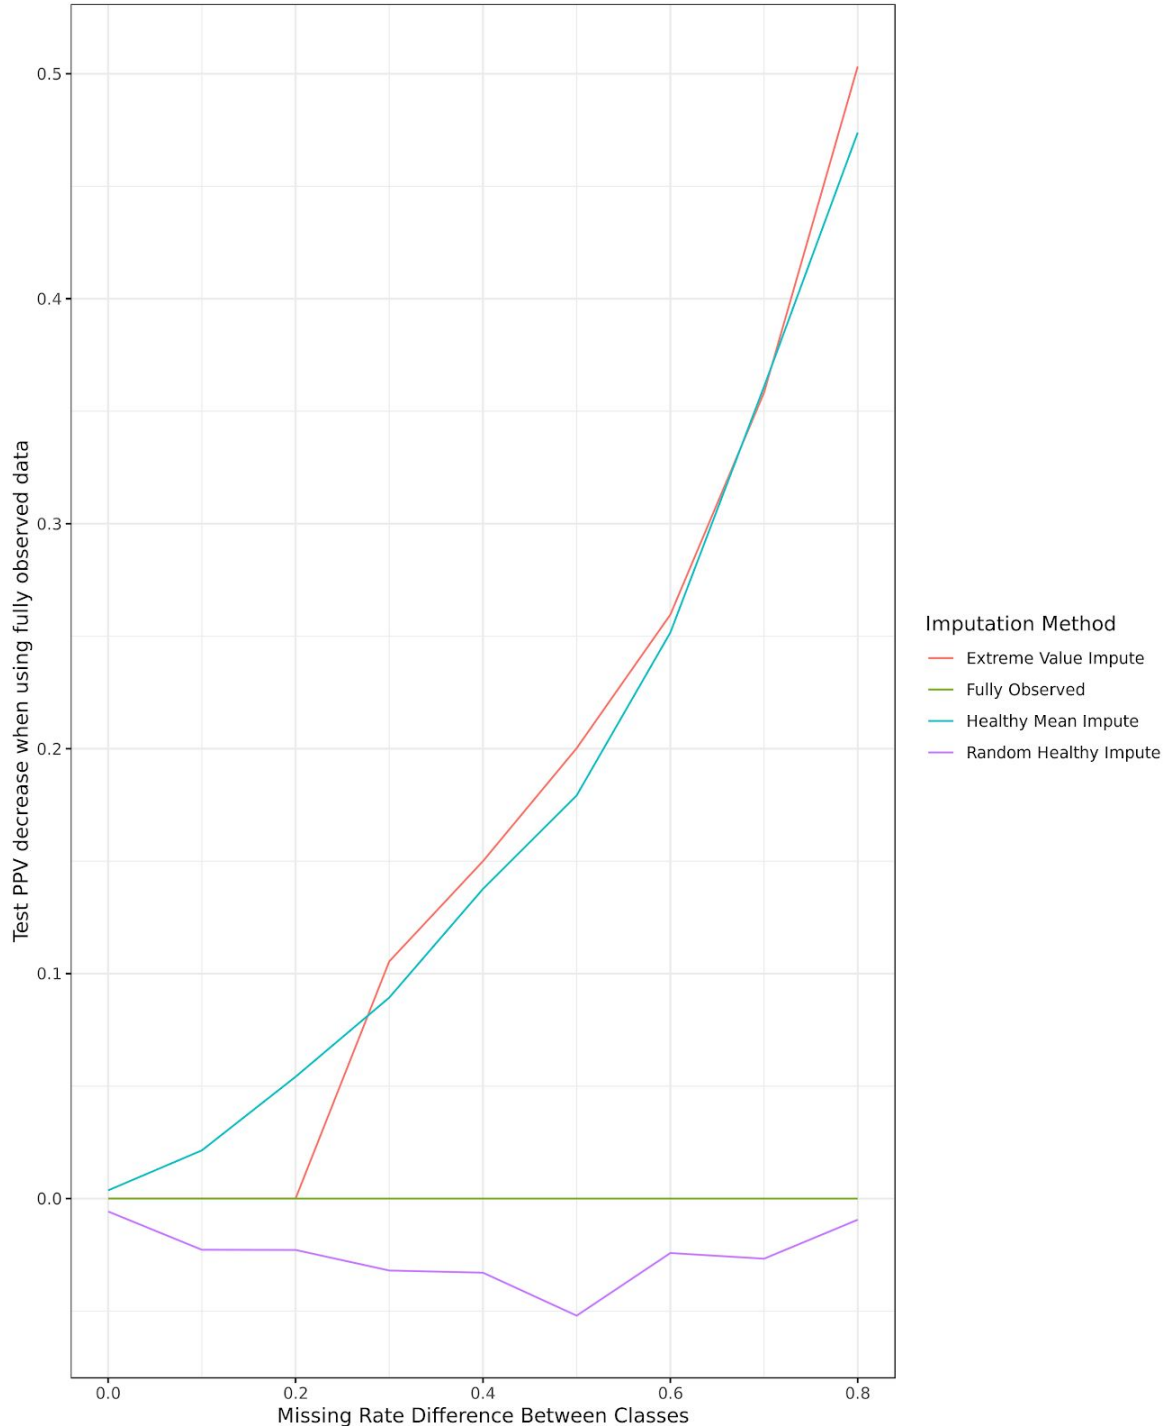

**Table D.4: PICTURE subgroup performance.** Event rates for AUPR were standardized to 4% or the raw encounter-level event rate. All performance statistics were computed at the encounter-level.

| Subgroup                            | Raw Encounter-Level Event Rate | AUROC | Raw AUPR | Standardized AUPR |
|-------------------------------------|--------------------------------|-------|----------|-------------------|
| All Events                          | 3.4%                           | 0.855 | 0.286    | 0.314             |
| All Events Sex = Female             | 3.0%                           | 0.860 | 0.279    | 0.349             |
| All Events Race = Black             | 3.6%                           | 0.845 | 0.257    | 0.273             |
| ICU Transfer vs. No Event           | 2.4%                           | 0.856 | 0.198    | 0.283             |
| Death vs. No Event                  | 0.7%                           | 0.945 | 0.208    | 0.546             |
| Vasoactive medications vs. No Event | 1.1%                           | 0.820 | 0.07     | 0.253             |
| Cardiac Arrest vs. No Event         | 0.4%                           | 0.825 | 0.004    | 0.157             |
